# Supplementary material for: Comprehension of Co-Speech Gestures in Aphasic Patients: An Eye Movement Study
Source: PubMed Central journal article supplement (PMC4703302; doi:10.1371/journal.pone.0146583), 2016-01-06
Supplement: pone.0146583.s001.pdf [file pone.0146583.s001.pdf]

## S1 Appendix 1. Video Stimuli

### Main Experiment:

| Verbal Stimuli                        | English                        | Congruent Meaningful Gesture                |
|---------------------------------------|--------------------------------|---------------------------------------------|
| <b>Congruent Condition</b>            |                                |                                             |
| Bodylotion eincremen                  | to apply body lotion           | applying body lotion                        |
| Einen Brief schreiben                 | to write a letter              | writing a letter                            |
| Essen schneiden                       | to cut food                    | cutting food                                |
| Gitarre spielen                       | to play guitar                 | playing guitar                              |
| Lasso werfen                          | to throw a lasso               | throwing a lasso                            |
| Suppe kochen                          | to cook a soup                 | cooking a soup                              |
| Teig kneten                           | to knead dough                 | kneading dough                              |
| Wäsche auswringen                     | to wring out laundry           | wringing out laundry                        |
| Einen Ball werfen                     | to throw a ball                | throwing a ball                             |
| Brille putzen                         | to clean one's glasses         | cleaning one's glasses                      |
| Tastatur schreiben                    | to write on a keyboard         | writing on a keyboard                       |
| Uhr lesen                             | to read a watch                | reading a watch                             |
| Uhr stellen                           | to set the time on a watch     | setting the time on a watch                 |
| Baby wiegen                           | to rock a baby                 | rocking a baby                              |
| Querflöte spielen                     | to play transverse flute       | playing transverse flute                    |
| Schirm öffnen                         | to open an umbrella            | opening an umbrella                         |
| Bedien' dich ruhig                    | help yourself                  | extending open hand, offering something     |
| Ich muss zum Coiffeur                 | I need a haircut               | pointing at one's hair                      |
| Meine Schulter ist verspannt          | my shoulder is tight           | massaging one's shoulder                    |
| Aber Achtung                          | watch out                      | extending one's index finger                |
| Mach doch eins nach dem andern        | make one thing at a time       | indicating separate actions with one's hand |
| Das finde ich nicht so gut            | I don't like that              | putting one's thumb down                    |
| Ganz ruhig                            | keep calm                      | moving hands up and down calmly             |
| Gibst Du mir etwas Münz?              | can you give me some change?   | extending open hand, begging                |
| Mir ist kalt                          | I am cold                      | rubbing one's upper arms                    |
| Ich habe keine Ahnung                 | I have no idea                 | shrugging one's shoulders                   |
| Kannst Du das etwas lauter sagen?     | can you say that a bit louder? | putting one's hand behind an ear            |
| Es war so lecker                      | it was so delicious            | holding one's stomach as if full            |
| Die Musik ist viel zu laut            | the music is much too loud     | covering one's ears with both hands         |
| Das gefällt mir                       | I like this                    | showing thumbs up                           |
| Ich hab Hunger                        | I am hungry                    | rubbing one's stomach                       |
| Ruf mich doch an                      | call me                        | holding one's hand at an ear                |
| Ich habe verloren*                    | I lost (e.g., a game)          | making a fist                               |
| <b>Verbal Stimuli</b>                 |                                |                                             |
| <b>English</b>                        |                                |                                             |
| <b>Incongruent Meaningful Gesture</b> |                                |                                             |
| <b>Incongruent Condition</b>          |                                |                                             |
| Einen Fisch angeln                    | to angle a fish                | cleaning a window                           |
| Zähne putzen                          | to brush one's teeth           | dialing a number on a telephone             |
| Mit den Fingern zählen                | to count with one's fingers    | throwing a dice                             |
| Socken stricken                       | to knit socks                  | throwing a coin                             |
| Zeitung lesen                         | to read a newspaper            | washing one's hands                         |
| An eine Türe klopfen                  | to knock on a door             | typing on a keyboard                        |
| Blumen giessen                        | to water flowers               | opening a bottle                            |
| Ein Getränk einschenken               | to pour a drink                | reading a newspaper                         |
| Nägel kauen                           | to bite one's fingernails      | raising a hand                              |
| Eine Flasche öffnen                   | to open a bottle               | Making up one's eyelashes                   |
| Einen Schwur leisten                  | to swear a vow                 | applying deodorant                          |
| Hände waschen                         | to wash one's hands            | knocking on a door                          |
| Eine Nummer wählen                    | to dial a number               | swearing a vow                              |
| Am Ohr kratzen                        | to scratch one's ear           | fanning oneself                             |
| Dieser Kaktus ist aber stachelig      | this cactus is thorny          | caressing something                         |
| Es ist nur ein kleines Sandwich       | it's only a small sandwich     | mimicking something large                   |

|                                |                               |                                            |
|--------------------------------|-------------------------------|--------------------------------------------|
| Prost                          | cheers                        | eating                                     |
| Die Herdplatte ist abgekühlt   | the cooktop has cooled down   | pulling away a hand rapidly                |
| Sie hat jetzt ganz kurze Haare | she has very short hair now   | depicting hair of over-shoulder length     |
| Was meinst denn Du dazu?       | what do you think about this? | pointing at oneself                        |
| Ich bin ganz entspannt         | I am totally relaxed          | tapping nervously with one's fingers       |
| Das gefällt mir gar nicht      | I don't like this at all      | thumbs up-sign                             |
| Das hast Du gut gemacht        | you did a good job            | thumbs down-sign                           |
| Ich weiss es                   | I know the answer             | shrugging one's shoulders, arms spread out |
| Ich bin ganz sicher            | I am very sure of this        | moving a hand upside down                  |

| Verbal Stimuli            | English                    | Incongruent Meaningful Gesture                  |
|---------------------------|----------------------------|-------------------------------------------------|
| <b>Baseline Condition</b> |                            |                                                 |
| Einen Brief öffnen        | to open a letter           | putting fingers on the contralateral shoulder   |
| Etwas ausradieren*        | to erase something         | putting both hands flat on the table            |
| In einen Apfel beissen    | to bite into an apple      | crossing over index and middle fingers          |
| Einen Knopf drücken       | to push a button           | roll one hand into a fist on the table          |
| Einen Ball rollen         | to roll a ball             | flip over one flat hand on the table            |
| Eine Briefmarke aufkleben | to put a stamp on a letter | tapping on one's throat with one finger         |
| Eine Brille aufsetzen     | to put on glasses          | holding one hand perpendicularly to the other   |
| Einen Cocktail mixen      | to mix a cocktail          | placing thumb on index finger of one hand       |
| Eine Dose öffnen          | to open a can              | putting one hand on top of the other            |
| Einen Gegenstand abwägen  | to weigh an object         | tapping one finger on one's cheek               |
| Klavier spielen           | to play piano              | putting both hands on one's head                |
| Eine Krawatte binden      | to knot a tie              | knocking on one forearm with one's hand         |
| Einen Kreis zeichnen      | to draw a circle           | pulling one's earlobe with two fingers          |
| Ein Messer schleifen      | to sharpen a knife         | stretching out one's elbow                      |
| Ein Streichholz anzünden  | to light a match           | putting both thumbs on the middle fingers       |
| Ein Tablett halten        | to hold a tray             | holding both fists in front of one's upper body |
| Einen Tisch abwischen     | to wipe a table            | tapping on one's head with a hand               |

Note. \* = omitted from analysis

| Control Experiment:<br>Performed Gesture | English                        | Choice of Possible Answers<br>(Correct Answer in Bold)                                             |
|------------------------------------------|--------------------------------|----------------------------------------------------------------------------------------------------|
| Auto fahren                              | to ride a car                  | to ride a motorcycle / <b>to ride a car</b> / to wash a car                                        |
| Nägel lackieren                          | to paint one's nails           | <b>to paint one's nails</b> / to cut one's nails / to paint a car                                  |
| Hände dehnen                             | to stretch one's hands         | to clap one's hands / <b>to stretch one's hands</b> /<br>to stretch one's legs                     |
| Baby wiegen                              | to rock a baby                 | to measure flour / to change a baby / <b>to rock a baby</b>                                        |
| Hände waschen                            | to wash one's hands            | <b>to wash one's hands</b> / to stretch one's hands /<br>to do laundry                             |
| Zeitung lesen                            | to read a paper                | to deliver a paper / <b>to read a paper</b> / to read a book                                       |
| Tastatur schreiben                       | to write on a keyboard         | <b>to write on a keyboard</b> / to fix a keyboard /<br>to write a letter                           |
| Essen schneiden                          | to cut food                    | to cut a paper / <b>to cut food</b> / to cook                                                      |
| Uhr lesen                                | to read a watch                | to read a paper / to set a watch / <b>to read a watch</b>                                          |
| Klavier spielen                          | to play the piano              | <b>to play the piano</b> / to tune a piano / to play cards                                         |
| Komm mal näher                           | come on closer                 | move over / <b>come closer</b> / come for dinner                                                   |
| Aber Achtung                             | watch out                      | stop / nothing is going to happen / <b>watch out</b>                                               |
| Es ist nur rein kleines Sandwich         | it's only a small sandwich     | <b>it's only a small sandwich</b> / it's only a little child /<br>it's a big sandwich              |
| Kannst Du das etwas lauter sagen?        | can you say that a bit louder? | my ear is itchy / <b>can you say that a bit louder?</b> /<br>the music is much too loud            |
| Sie hat jetzt ganz kurze Haare           | she has very short hair now    | she has long hair now / <b>she has very short hair now</b> /<br>she is wearing a short skirt today |
